# Supplementary material
Source: Springer Nature journal article supplement (https://www.springermedizin.de/resource/supplementary/12882_2011_241_MOESM3_ESM.pdf/9453352)

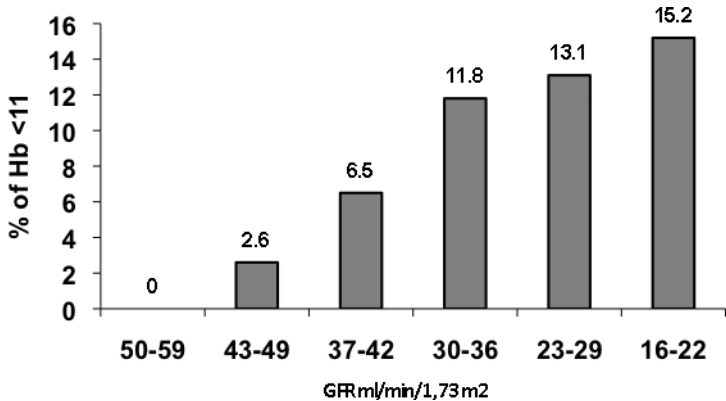

Supplement: MOESM3 [file 9453352]
